# Supplementary material for: Strengthened Assimilate Transport Improves Yield and Quality of Super Rice
Source: MDPI journal article supplement (doi:10.3390/agronomy12040753), 2022-03-22
Supplement: s1 [file s1]

**Table S1. Primer sequences used in the quantitative RT-PCR**

| Gene        | cDNA<br>number | Forwad(5'-3')          | Reverse(5'-3')         |
|-------------|----------------|------------------------|------------------------|
| <i>SUT1</i> | AK100027       | GGTGGCATGCTGCTATTGTA   | GTTAGCTGTGCCAGGTCCAT   |
| <i>SUT2</i> | AB091672       | TGGTCACTCAAGGACTTCCA   | CACTGTACAGAACGGCGAGA   |
| <i>CIN2</i> | EU095553       | AACATGTACCAGCCGACGTTTG | AAGCTCTCAACAACCGACCTGT |
| UBQ5        | AK061988       | ACCACTTCGACCGCCACTACT  | ACGCCTAAGCCTGCTGGTT    |

**Table S2. Supplementary data of other indicators of rice quality in the study**

| Variety   | Transparency | Grain length<br>(mm) | Length-width ratio | Alkali spreading value |
|-----------|--------------|----------------------|--------------------|------------------------|
| Yongyou9  | 0.63 a       | 6.25 a               | 2.65 a             | 4.23 b                 |
| Yongyou12 | 0.65 a       | 5.30 b               | 2.18 b             | 4.88 a                 |

*Note:* Different letters indicate a significant difference at the 0.05 probability level.
